# Supplementary material for: Effect of gut microbiota on depressive-like behaviors in mice is mediated by the endocannabinoid system
Source: PubMed Central journal article supplement (PMC7732982; doi:10.1038/s41467-020-19931-2), 2020-12-11
Supplement: 41467_2020_19931_MOESM1_ESM.pdf [file 41467_2020_19931_MOESM1_ESM.pdf]

## SUPPLEMENTARY INFORMATION

Supplementary Table 1: Timeline of the Stressor Exposure used in the Unpredictable Chronic Mild Stress (UCMS) Protocol.

Supplementary Figure 1: Microbiota from UCMS Mice Transfers Depressive-like Behaviors.

Supplementary Figure 2: UCMS Microbiota Transfers Depressive-like Behaviors to Recipient Antibiotic-treated Mice.

Supplementary Figure 3: Complementary Analysis of Metabolomic Profiles in Recipient Mice.

Supplementary Figure 4: Immune Cell Populations, Tryptophan Metabolism and Corticosterone Levels in Recipient Mice

Supplementary Figure 5: Adult Neurogenesis in Dorsal and Ventral Hippocampus are Modulated by the eCB System.

Supplementary Figure 6: Arachidonic Acid or *Lactobacillus plantarum*<sup>WJL</sup> Complementation Increase Hippocampus Levels of n-3, n-6 PUFA and AEA.

Supplementary Figure 7: Unpredictable Chronic Mild Stress (UCMS) Alters Gut Microbiota and is Transferable to Recipient Mice.

Supplementary Table 1

|        | Monday                                                    | Tuesday                 | Wednesday                                       | Thursday                                       | Friday                                                       |
|--------|-----------------------------------------------------------|-------------------------|-------------------------------------------------|------------------------------------------------|--------------------------------------------------------------|
| Week 1 | Blood & feces (11h-13h)                                   | No sawdust (10h-14h)    | 3 cage changes (9h30-12h30)                     | Damp sawdust (10h-13h30)                       | No sawdust (10h-13h)                                         |
|        | Cage tilt 45° (14h30-19h)                                 | Damp sawdust (14h-18h)  | Foreign odor (18h)                              | Cage tilt 45° (14h-18h)                        | Foreign odor (14h)<br>Reversal of the L/D cycle (19h)        |
| Week 2 | Back to normal L/D cycle (9h)                             | Damp sawdust (10h-15h)  | No sawdust (10h30-15h30)                        | Cage tilt 45° (10h-15h)                        | No sawdust (10h-13h)                                         |
|        | Confinement (14h-14h30)<br>Foreign odor(15h)              | Cage tilt 45° 18h)      | Foreign odor (15h30)                            | Confinement (15h30-16h)<br>Damp sawdust 16h30) | Foreign odor (15h)<br>Reversal of the L/D cycle (19h)        |
| Week 3 | Back to normal L/D cycle (9h)                             | No sawdust (10h-14h)    | No sawdust (10h-14h)                            | Confinement (10h30-11h)                        | Damp sawdust (10h-14h)                                       |
|        | Damp sawdust (14h-18h)                                    | Confinement (14h30-15h) | Cage tilt 45° (14h30-19h)                       | 4 cage changes (14h-18h)<br>Foreign odor (18h) | No sawdust (14h-19h)<br>Reversal of the L/D cycle (19h)      |
| Week 4 | Back to normal L/D cycle (9h)<br>Cage tilt 45° (9h30-14h) | No sawdust (10h-14h)    | 3 cage changes (9h30-12h30)                     | Damp sawdust (10h-15h)                         | No sawdust (10h-14h)                                         |
|        | Confinement (14h-14h30)                                   | Damp sawdust (14h-18h)  | Cage tilt 45° (14h30-18h)<br>Foreign odor (18h) | Confinement (15h30-16h)                        | Cage tilt 45° (14h30-19h)<br>Reversal of the L/D cycle (19h) |

Repeated once for a total of 8 weeks

# Supplementary Figure 1

**A** Novelty Suppressed Feeding test

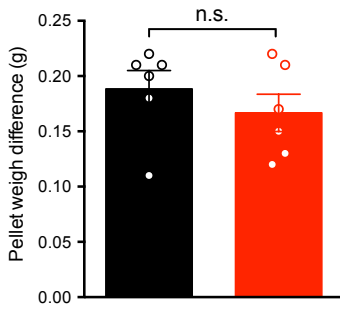

**B** Splash test

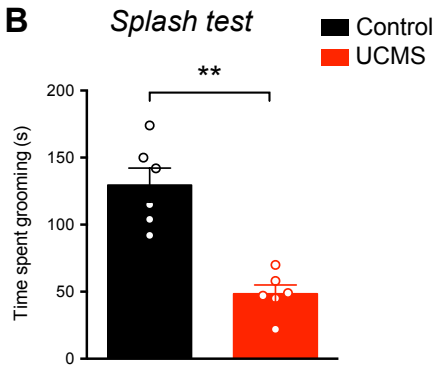

**C** Splash test

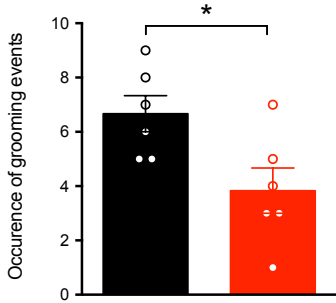

**D**

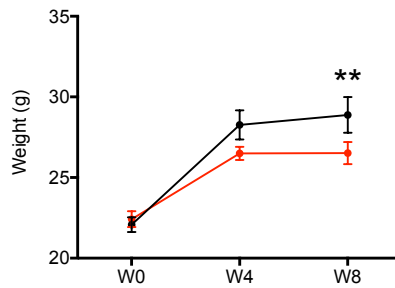

**E** Novelty Suppressed Feeding test

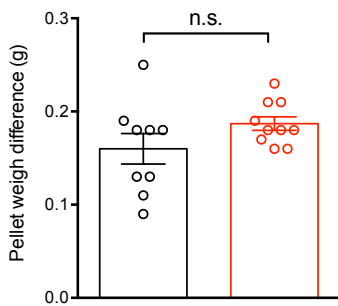

**F** Splash test

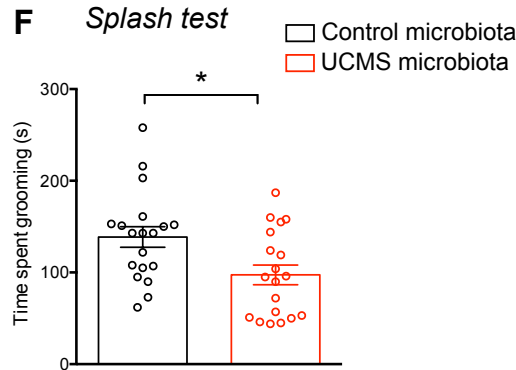

**G** Splash test

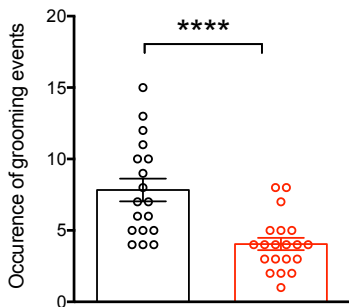

**H**

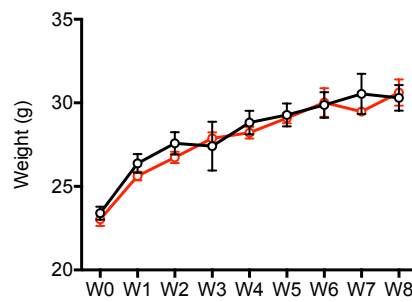

**Supplementary Figure 1. Microbiota from UCMS Mice Transfers Depressive-like Behaviors.** Control mice, or mice subjected to UCMS (donor mice) (**A-D**), and mice recipient of the microbiota from control or UCMS mice (**E-H**), underwent different behavioral tests. **A,E**, Feeding drive of Control mice ( $n = 6$ ), UCMS mice ( $n = 6$ ), Control microbiota- ( $n = 9$ ) and UCMS microbiota-recipient mice ( $n = 10$ ) in the novelty suppressed feeding test as assessed by the pellet consumption (weight difference) during 10 minutes after the test (Control vs UCMS mice,  $P = 0.5152$ ; Control microbiota- vs UCMS microbiota-recipient mice,  $P = 0.2271$ ). **B,F**, Time spent grooming for Control mice ( $n = 6$ ), UCMS mice ( $n = 6$ ), Control microbiota- ( $n = 19$ ) and UCMS microbiota-recipient mice ( $n = 19$ ) in the splash test (Control vs UCMS mice,  $P = 0.0022$ ; Control microbiota- vs UCMS microbiota-recipient mice,  $P = 0.0210$ ). **C,G**, Occurrence of self-grooming events for Control mice ( $n = 6$ ), UCMS mice ( $n = 6$ ), Control microbiota- ( $n = 19$  mice) and UCMS microbiota-recipient mice ( $n = 19$  mice) in the splash test (Control vs UCMS mice,  $P = 0.0325$ ; Control microbiota- vs UCMS microbiota-recipient mice,  $P < 0.0001$ ). **D, H**, Body weight was measured during the UCMS protocol ( $n = 6$ /group, **D**) and after FMT in Control microbiota ( $n = 9$ ) and UCMS microbiota-recipient mice ( $n = 10$ , **H**). Data are represented as mean  $\pm$  s.e.m. Statistical significance was calculated using the Mann Whitney test ( $*P < 0.05$ ,  $** P < 0.01$ ,  $*** P < 0.001$ ,  $**** P < 0.0001$ , two tailed).

Supplementary Figure 2

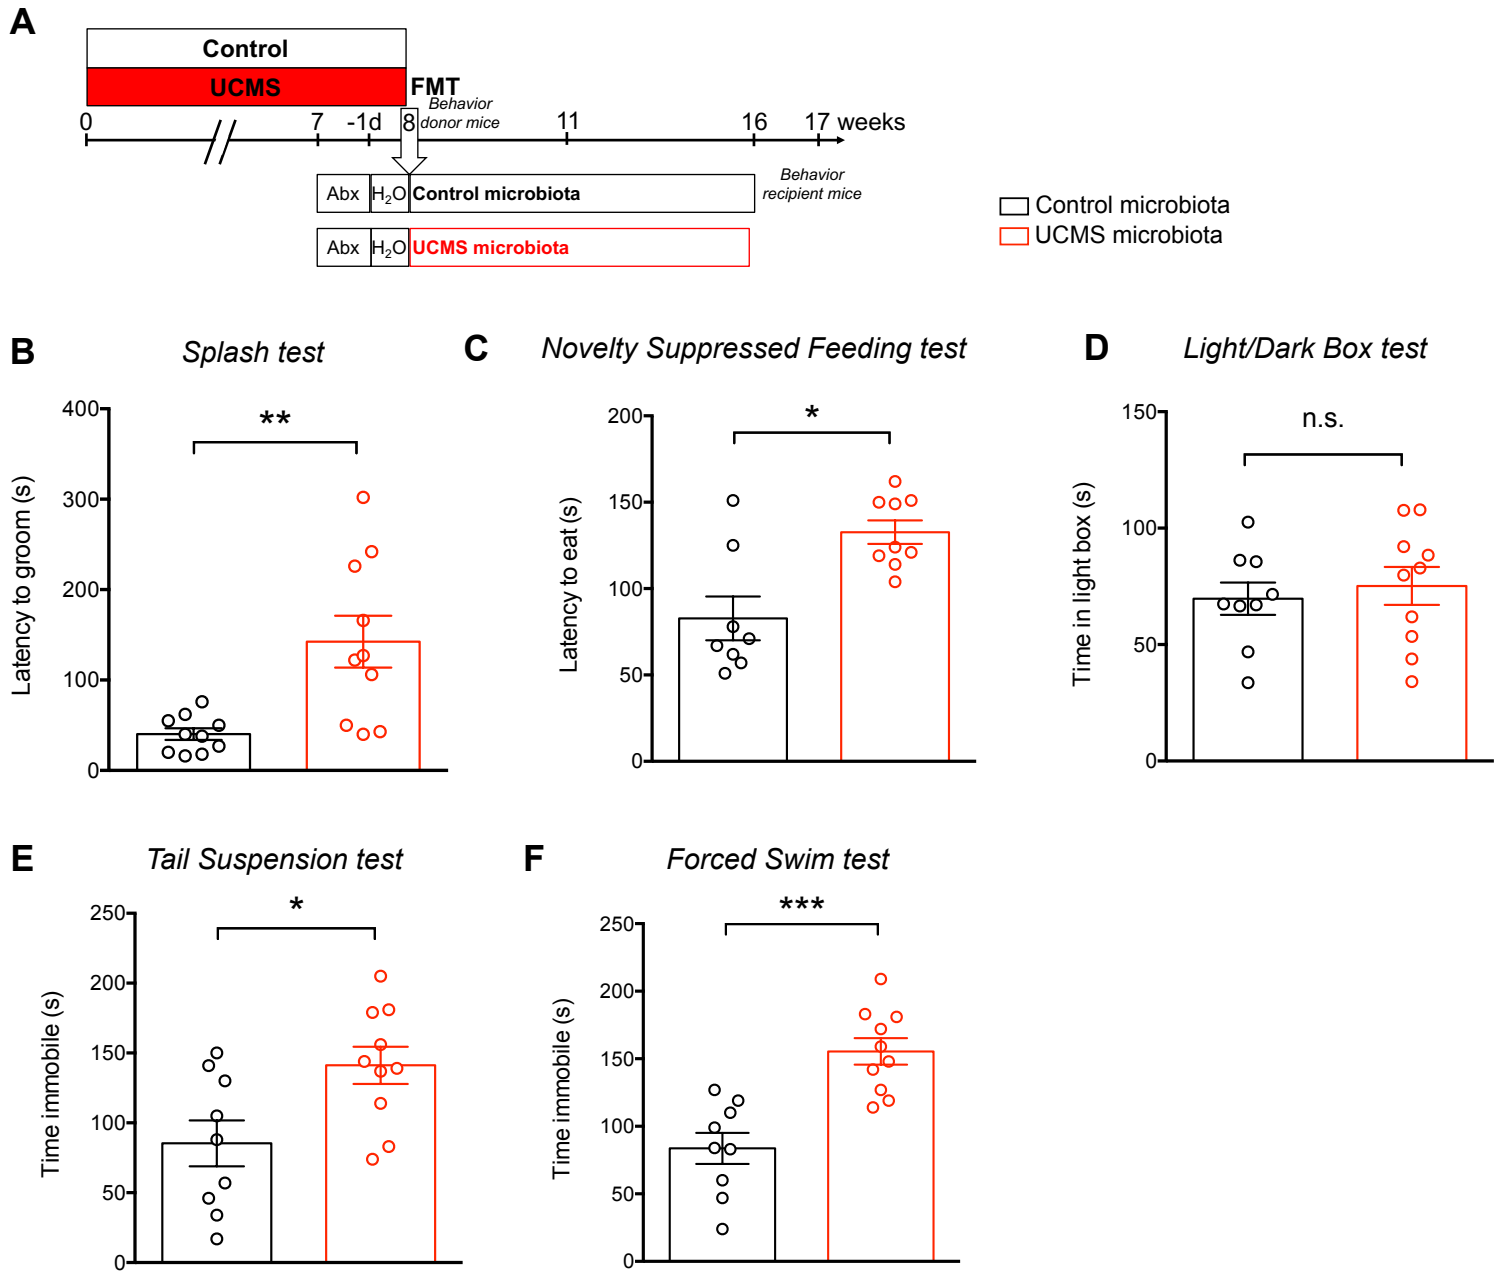

**Supplementary Figure 2. Unpredictable Chronic Mild Stress (UCMS) Microbiota Transfers Depressive-like Behaviors to Recipient Antibiotic-treated Mice. A,** Experimental timeline of Fecal Microbiota Transplantation (FMT) from Control and UCMS mice, respectively 'Control microbiota' and 'UCMS microbiota', to antibiotic (Abx)-treated recipient mice. Recipient mice were given a combination of vancomycin (0.5 g/l), ampicillin (1 g/l), streptomycin (5 g/L), colistin (1 g/l), and metronidazole (0.5 g/l) in their drinking water for 6 consecutive days. Twenty-four hours later, animals were colonized via two rounds of oral gavage with microbiota, separated 3 days apart, and kept in separate sterile isolators. Donor microbiota was acquired from pooled fecal samples from 5-6 animals and resuspended in PBS. **B-F,** Recipient mice underwent different behavioral tests: **B,** Latency to groom in the splash test for Control microbiota- ( $n = 10$ ) and UCMS microbiota-recipient mice ( $n = 10$ ) (Control microbiota- vs UCMS microbiota-recipient mice,  $P = 0.0026$ ). **C,** Latency to eat in a novel environment in the Novelty Suppressed Feeding test for Control microbiota- ( $n = 8$ ), UCMS microbiota-recipient mice ( $n = 10$ ) (Control microbiota- vs UCMS microbiota-recipient mice,  $P = 0.0214$ ). **D,** Time spent in the light box in the Light/Dark Box test for Control microbiota- ( $n = 9$ ) and UCMS microbiota-recipient mice ( $n = 10$ ) (Control microbiota- vs UCMS microbiota-recipient mice,  $P = 0.6038$ ). **E,F,** Time spent immobile in the Tail Suspension test (**E**) and time spent immobile in the Forced Swim Test for Control microbiota- ( $n = 9$ ), and UCMS microbiota-recipient mice ( $n = 10$ , **F**) (Control microbiota- vs UCMS microbiota-recipient mice,  $P = 0.0002$ ). Data are represented as mean  $\pm$  s.e.m. Statistical significance was calculated using the Mann Whitney test (\* $P < 0.05$ , \*\*  $P < 0.01$ , \*\*\*  $P < 0.001$ , two tailed).

### Supplementary Figure 3

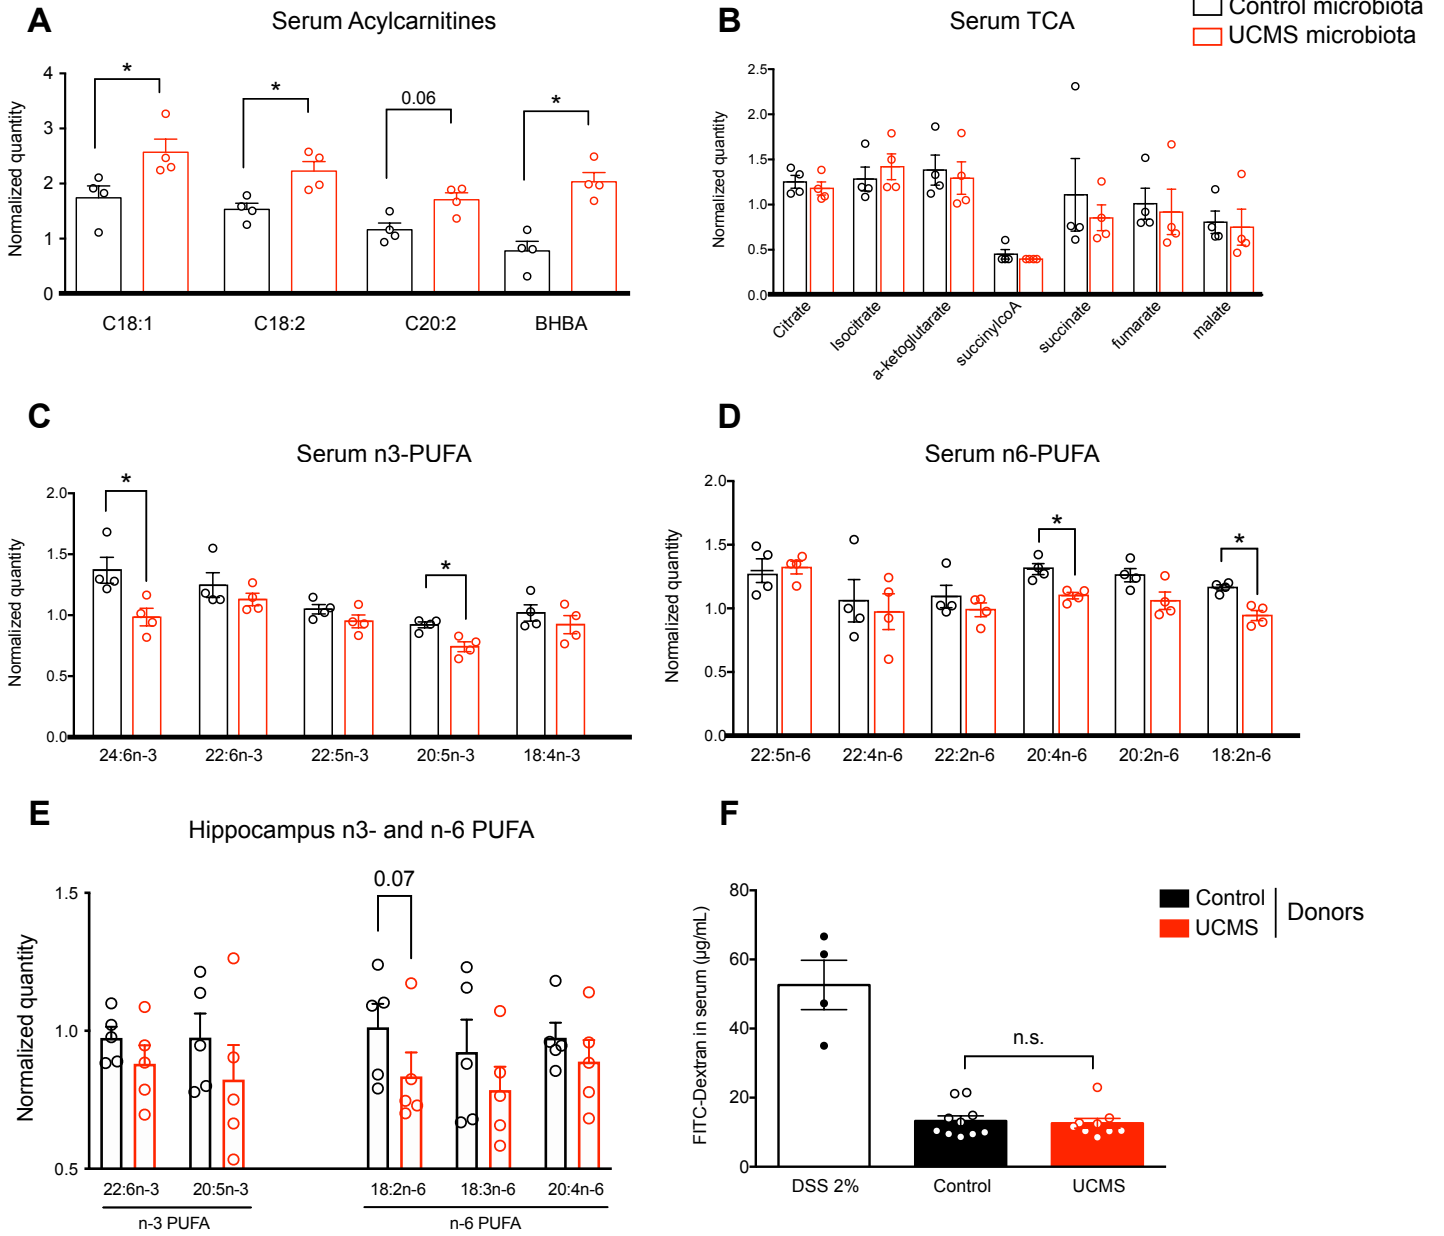

**Supplementary Figure 3. Complementary Analysis of Metabolomic Profiles in Recipient Mice. A-D.** Normalized levels of serum acylcarnitines (\*,  $P = 0.0286$ ; except for C20:2 with  $P = 0.0571$ ), (**A**), products of the TCA cycle (**B**), n3-PUFA (\*,  $P = 0.0286$ ) (**C**) and n6-PUFA (\*,  $P = 0.0286$ ) (**D**), ( $n = 4$ /group). **E**, Normalized levels of hippocampal n-3 and n-6 PUFA ( $n = 5$ /group) (18:2,  $P = 0.075$ ). Data are represented as mean  $\pm$  s.e.m. Statistical significance was calculated using the Mann Whitney test (\*  $P < 0.05$ , two tailed). **F**, Intestinal permeability was measured by FITC intensity in serum after oral gavage with FITC-Dextran in Control ( $n = 10$ ) and UCMS mice ( $n = 9$ ). Dextran sodium sulfate (DSS) is used as a positive control ( $n = 4$ ). Data are represented as mean  $\pm$  s.e.m. Statistical significance was calculated using the Mann Whitney test (Control vs UCMS mice,  $P > 0.999$ , two tailed).



Supplementary Figure 4

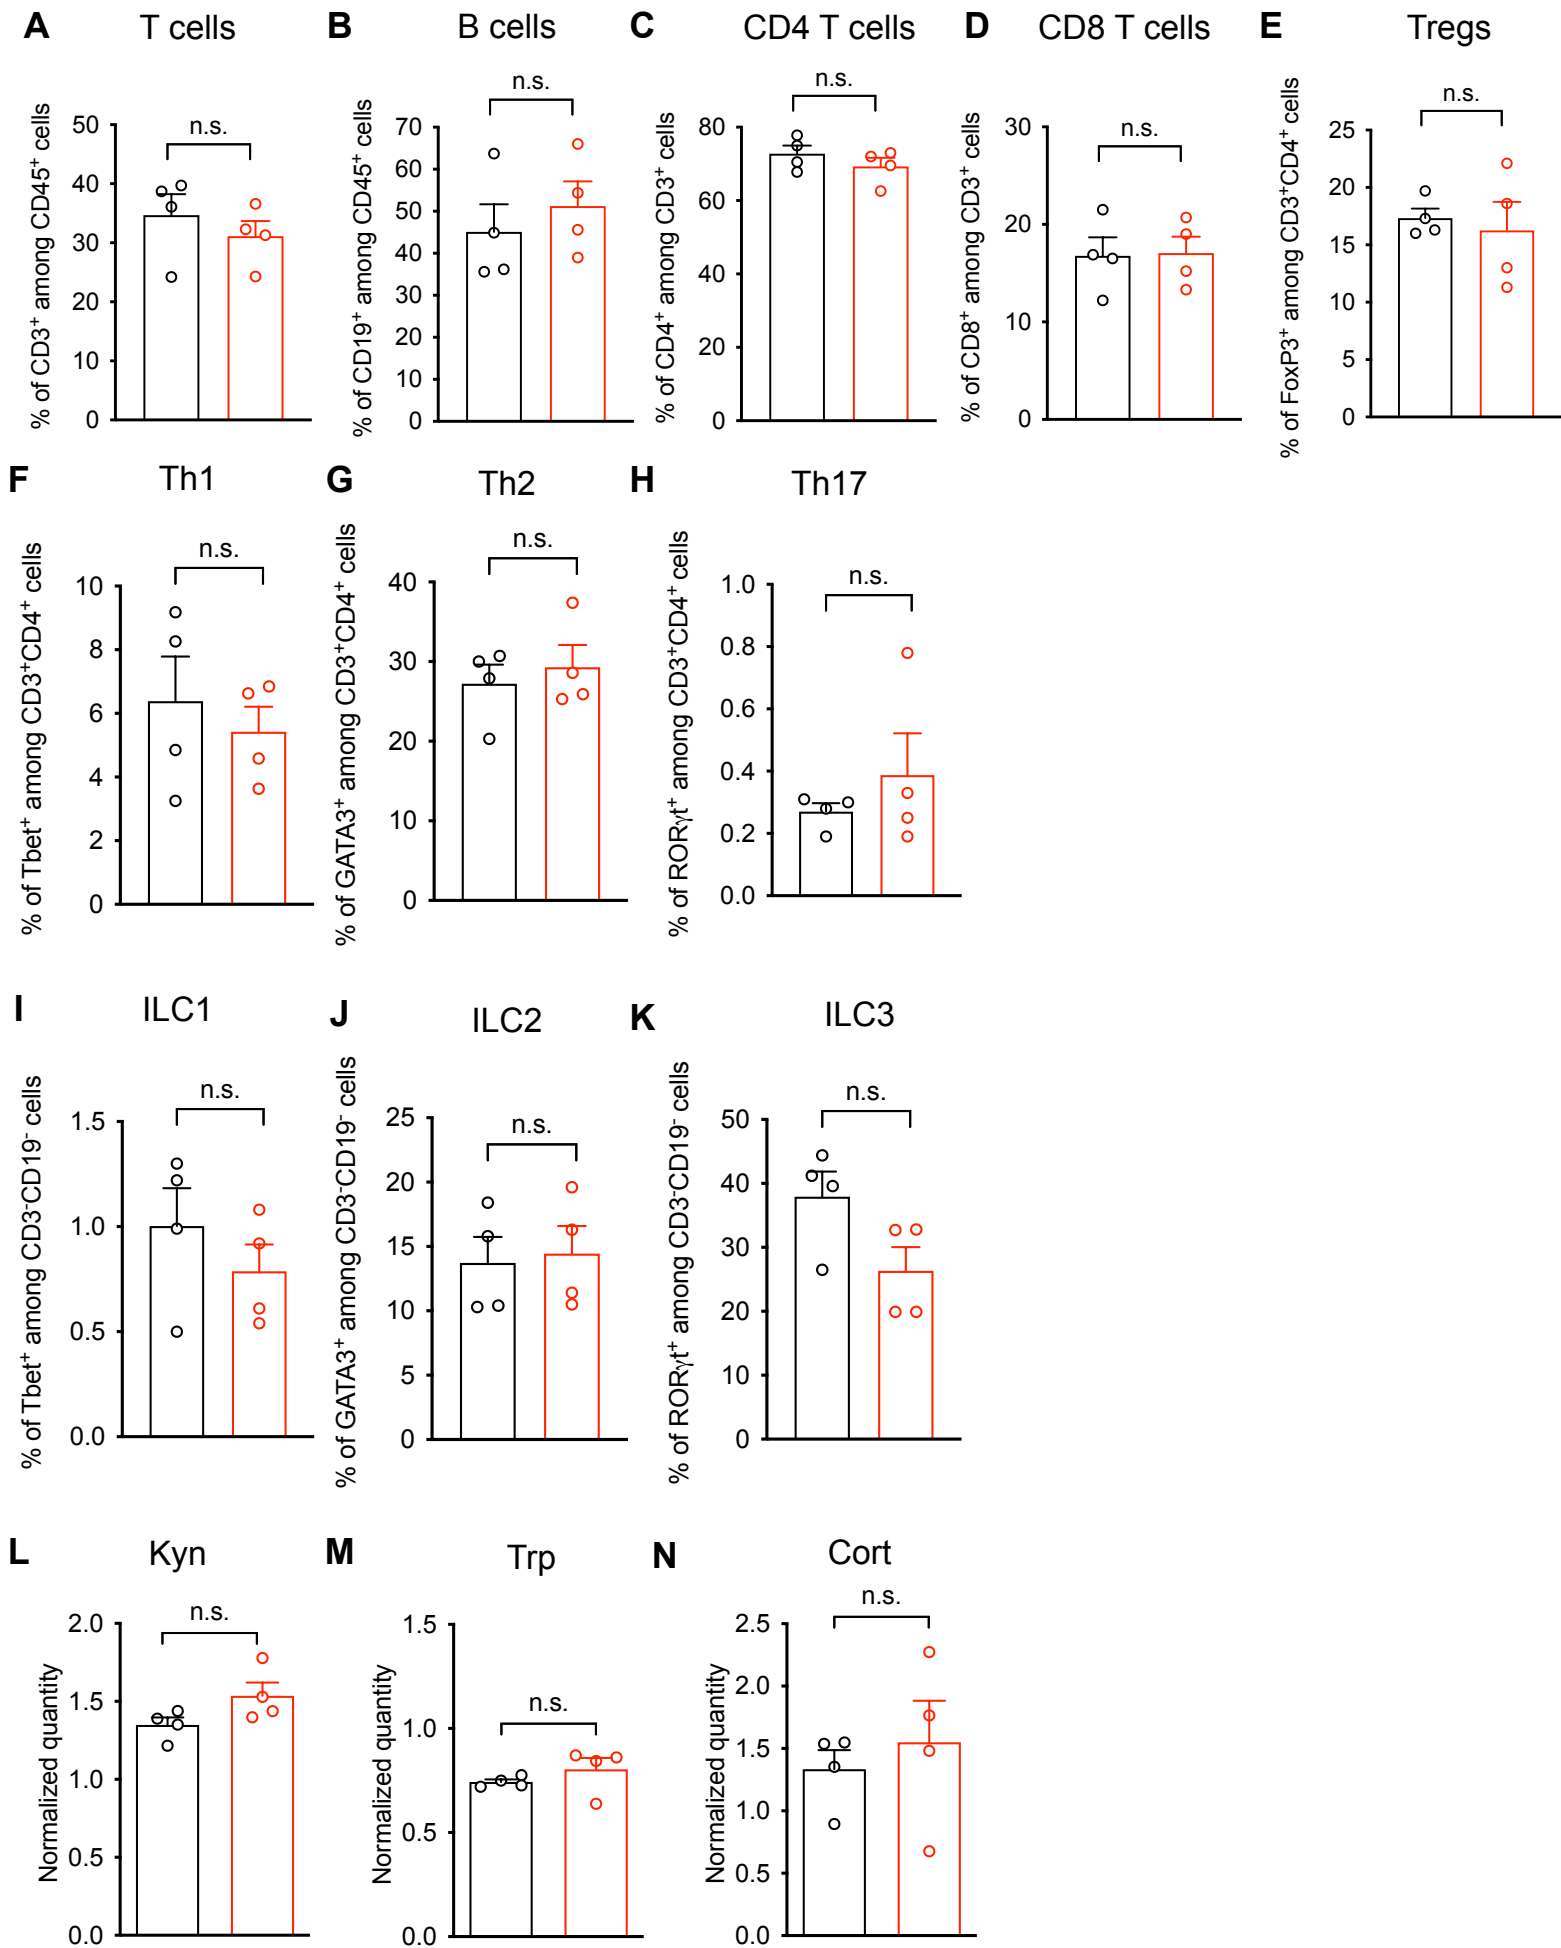

**Supplementary Figure 4. Immune Cell Populations, Tryptophan Metabolism and Corticosterone Levels in Recipient Mice.** **A**, Percentage of T cells (CD3<sup>+</sup>) among CD45<sup>+</sup> cells; **B**, Percentage of B cells (CD19<sup>+</sup>) among CD45<sup>+</sup> cells; **C**, Percentage of CD4 T cells (CD4<sup>+</sup>) among T cells (CD3<sup>+</sup>); **D**, Percentage of CD8 T cells (CD8<sup>+</sup>) among T cells (CD3<sup>+</sup>); **E**, Percentage of regulatory T cells (Tregs, FoxP3<sup>+</sup>) among CD4 T cells (CD4<sup>+</sup>CD3<sup>+</sup>); **F**, Percentage of type 1 CD4 T cells (Th1, Tbet<sup>+</sup>) among CD4 T cells (CD4<sup>+</sup>CD3<sup>+</sup>); **G**, Percentage of type 2 CD4 T cells (Th2, GATA3<sup>+</sup>) among CD4 T cells (CD4<sup>+</sup>CD3<sup>+</sup>); **H**, Percentage of type 17 CD4 T cells (Th17, ROR $\gamma$ t<sup>+</sup>) among CD4 T cells (CD4<sup>+</sup>CD3<sup>+</sup>); **I**, Percentage of type 1 innate lymphoid cells (ILC1, Tbet<sup>+</sup>) among non-T non-B cells (CD3<sup>-</sup>CD19<sup>-</sup>); **J**, Percentage of type 2 innate lymphoid cells (ILC2, GATA3<sup>+</sup>) among non-T non-B cells (CD3<sup>-</sup>CD19<sup>-</sup>); **K**, Percentage of type 3 innate lymphoid cells (ILC3, ROR $\gamma$ t<sup>+</sup>) among non-T non-B cells (CD3<sup>-</sup>CD19<sup>-</sup>) in the lamina propria of control microbiota (n = 4) and UCMS microbiota recipient mice (n = 4). **L**, Normalized levels of kynurenin; **M**, Normalized levels of tryptophan, **N**, Normalized levels of corticosterone in the serum of control microbiota (n = 4) and UCMS microbiota recipient mice (n = 4). Data are represented as mean  $\pm$  s.e.m. Statistical significance was calculated using the Mann Whitney test (two tailed).

# Supplementary Figure 5

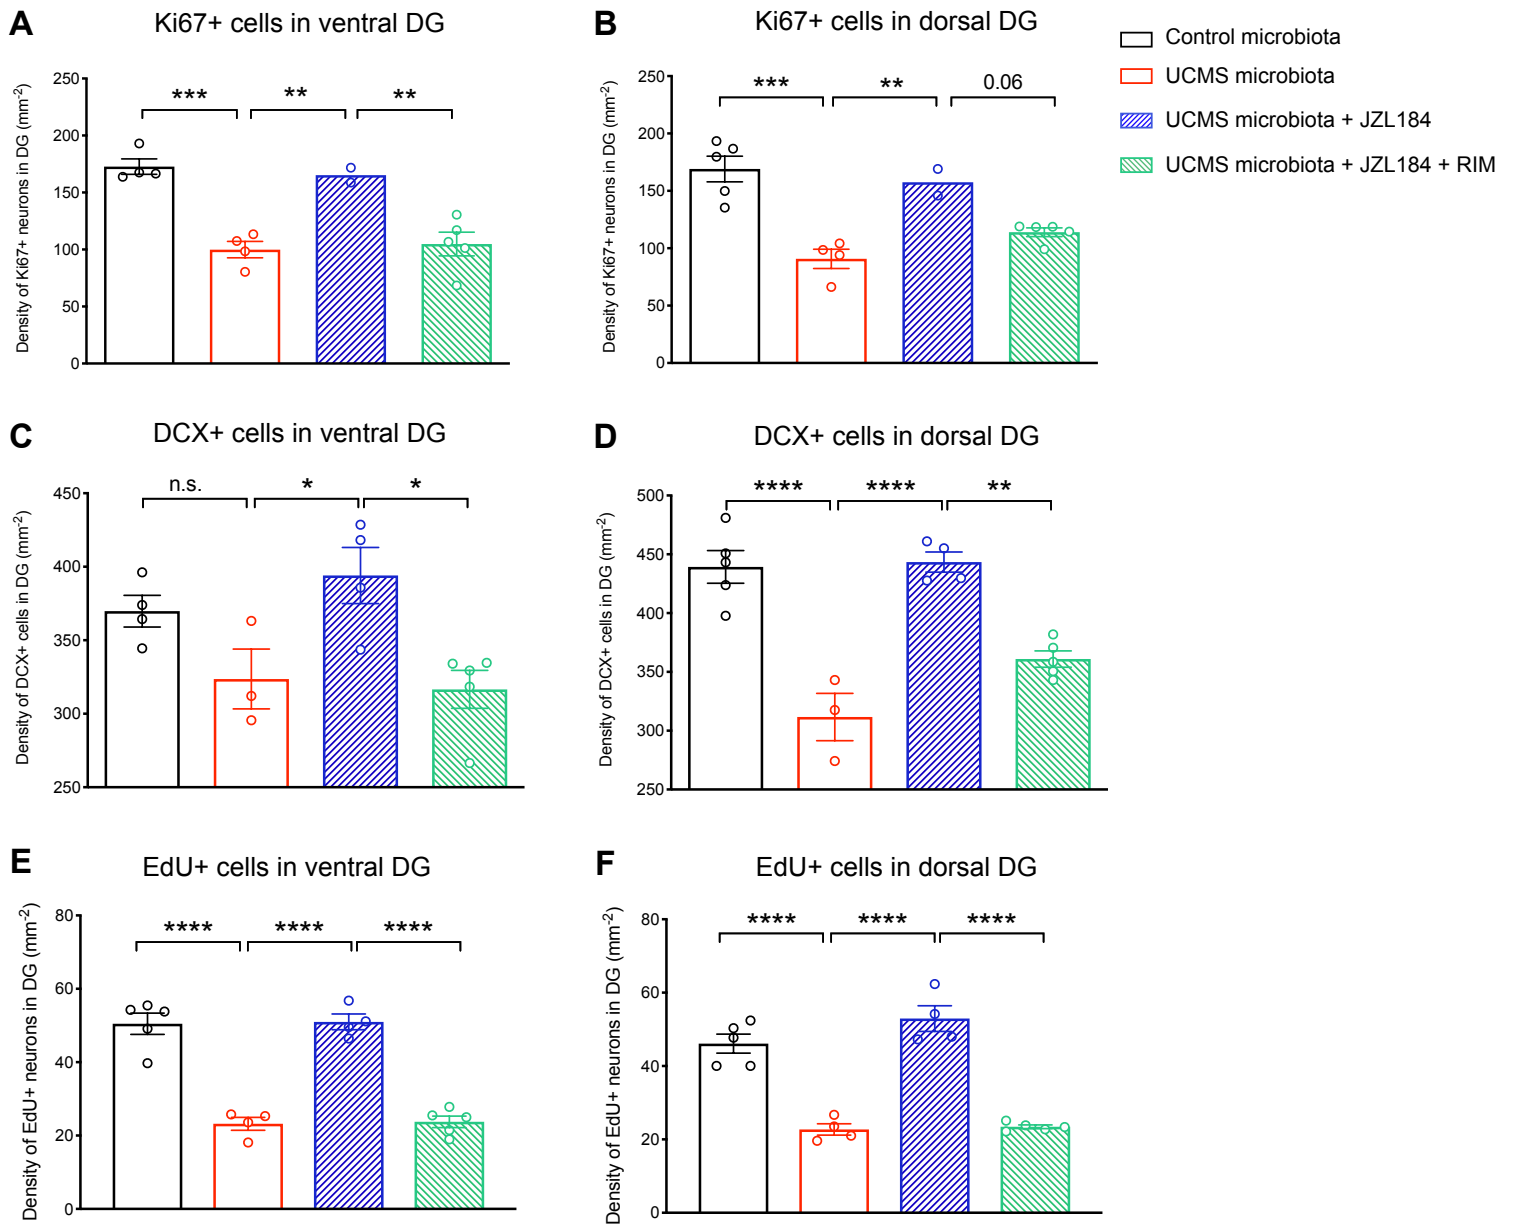

**Supplementary Figure 5. Adult Neurogenesis in Dorsal and Ventral Hippocampus are Modulated by the eCB System. A,**

Quantitative evaluation of the density of Ki67<sup>+</sup> cells in ventral DG for Control microbiota-recipient mice ( $n = 4$ ), UCMS microbiota-recipient mice ( $n = 4$ ), UCMS microbiota-recipient mice treated with JZL184 ( $n = 2$ ) and UCMS microbiota-recipient mice treated with JZL184 and rimonabant ( $n = 5$ ). (Control microbiota- vs UCMS microbiota-recipient mice,  $P = 0.0005$ ; UCMS microbiota-recipient mice vs UCMS microbiota-recipient mice + JZL184,  $P = 0.006$ ; UCMS microbiota-recipient mice + JZL184 vs UCMS microbiota-recipient mice + JZL184 + RIM,  $P = 0.0081$ ).

**B,** Quantitative evaluation of the density of Ki67<sup>+</sup> cells in dorsal DG for Control microbiota-recipient mice ( $n = 5$ ), UCMS microbiota-recipient mice ( $n = 4$ ), UCMS microbiota-recipient mice treated with JZL184 ( $n = 2$ ), UCMS microbiota-recipient mice treated with JZL184 and rimonabant ( $n = 5$ ). (Control microbiota- vs UCMS microbiota-recipient mice,  $P = 0.0002$ ; UCMS microbiota-recipient mice vs UCMS microbiota-recipient mice + JZL184,  $P = 0.0053$ ; UCMS microbiota-recipient mice + JZL184 vs UCMS microbiota-recipient mice + JZL184 + RIM,  $P = 0.0586$ ).

**C,** Quantitative evaluation of the density of DCX<sup>+</sup> cells in ventral DG for Control microbiota-recipient mice ( $n = 4$ ), UCMS microbiota-recipient mice ( $n = 3$ ), UCMS microbiota-recipient mice treated with JZL184 ( $n = 4$ ), UCMS microbiota-recipient mice treated with JZL184 and rimonabant ( $n = 5$ ). Control microbiota- vs UCMS microbiota-recipient mice,  $P = 0.2603$ ; UCMS microbiota-recipient mice vs UCMS microbiota-recipient mice + JZL184,  $P = 0.0498$ ; UCMS microbiota-recipient mice + JZL184 vs UCMS microbiota-recipient mice + JZL184 + RIM,  $P = 0.0135$ .

**D,** Quantitative evaluation of the density of DCX<sup>+</sup> cells in dorsal DG for Control microbiota-recipient mice ( $n = 5$ ), UCMS microbiota-recipient mice ( $n = 3$ ), UCMS microbiota-recipient mice treated with JZL184 ( $n = 4$ ) and UCMS microbiota-recipient mice treated

with JZL184 and rimonabant ( $n = 5$ ). Control microbiota- vs UCMS microbiota-recipient mice,  $P < 0.0001$ ; UCMS microbiota-recipient mice vs UCMS microbiota-recipient mice + JZL184,  $P < 0.0001$ ; UCMS microbiota-recipient mice + JZL184 vs UCMS microbiota-recipient mice + JZL184 + RIM,  $P = 0.0014$ . **E**, Quantitative evaluation of the density of EdU<sup>+</sup> cells in ventral DG for Control microbiota-recipient mice ( $n = 5$ ), UCMS microbiota-recipient mice ( $n = 4$ ), UCMS microbiota-recipient mice treated with JZL184 ( $n = 4$ ), UCMS microbiota-recipient mice treated with JZL184 and rimonabant ( $n = 5$ ). Control microbiota- vs UCMS microbiota-recipient mice,  $P < 0.0001$ ; UCMS microbiota-recipient mice vs UCMS microbiota-recipient mice + JZL184,  $P < 0.0001$ ; UCMS microbiota-recipient mice + JZL184 vs UCMS microbiota-recipient mice + JZL184 + RIM,  $P < 0.0001$ . **F**, Quantitative evaluation of the density of EdU<sup>+</sup> cells in dorsal DG for Control microbiota-recipient mice ( $n = 5$ ), UCMS microbiota-recipient mice ( $n = 4$ ), UCMS microbiota-recipient mice treated with JZL184 ( $n = 4$ ) and UCMS microbiota-recipient mice treated with JZL184 and rimonabant ( $n = 5$ ). Control microbiota- vs UCMS microbiota-recipient mice,  $P < 0.0001$ ; UCMS microbiota-recipient mice vs UCMS microbiota-recipient mice + JZL184,  $P < 0.0001$ ; UCMS microbiota-recipient mice + JZL184 vs UCMS microbiota-recipient mice + JZL184 + RIM,  $P < 0.0001$ . Scale bars: 100 $\mu$ m. Data are represented as mean  $\pm$  s.e.m. Statistical significance was calculated using One-way ANOVA with Tukey's multiple comparisons test (\* $P < 0.05$ , \*\*  $P < 0.01$ , \*\*\*  $P < 0.005$ , \*\*\*\*  $P < 0.0001$ ).

Supplementary Figure 6

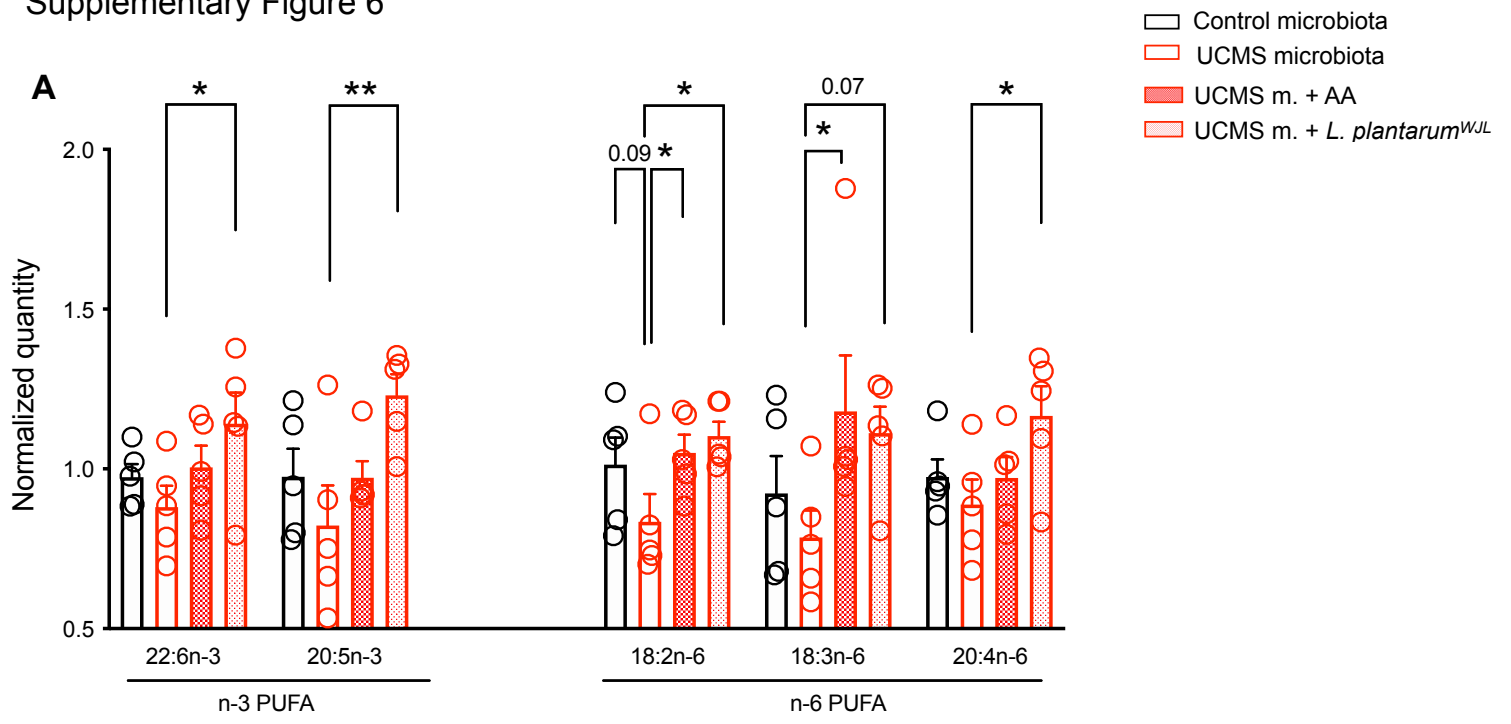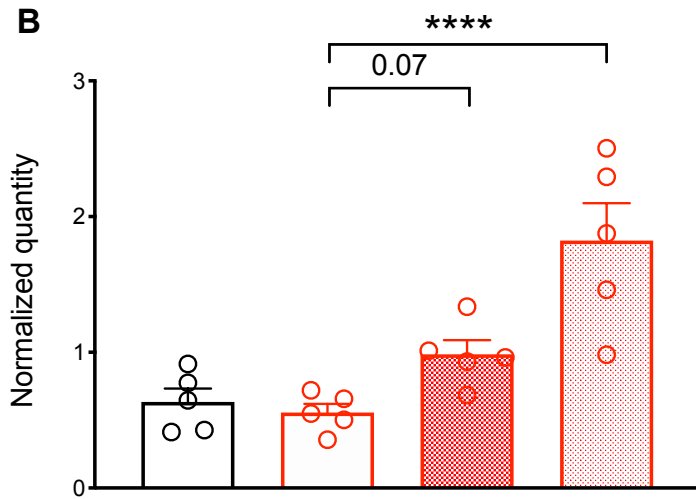

### **Supplementary Figure 6. Arachidonic Acid or *L. plantarum*<sup>WJL</sup> Complementation**

#### **Increase Hippocampus Levels of n-3, n-6 PUFA and AEA. A,**

Normalized levels of n-3 and n-6 PUFA in the hippocampus of recipient mice, supplemented with either AA or *L. plantarum*<sup>WJL</sup> (n=5/group), as determined by LC-MS. Control microbiota and UCMS microbiota are the same as in supplementary figure 3E. Data are represented as mean ± s.e.m. Statistical significance was calculated using One-way ANOVA test for each selected PUFA (\* P<0.05, \*\* P<0.01). (C22:6, UCMS microbiota vs UCMS microbiota + *Lp*<sup>WJL</sup>, P = 0.019; C20:5, UCMS microbiota vs UCMS microbiota + *Lp*<sup>WJL</sup>, P = 0.005; C18:2, Control microbiota vs UCMS microbiota, P = 0.09; UCMS microbiota vs UCMS microbiota + AA, P = 0.047; UCMS microbiota vs UCMS microbiota + *Lp*<sup>WJL</sup>, P = 0.016; C18:3, UCMS microbiota vs UCMS microbiota + AA, P = 0.035; UCMS microbiota vs UCMS microbiota + *Lp*<sup>WJL</sup>, P = 0.074; UCMS microbiota vs UCMS microbiota + *Lp*<sup>WJL</sup>, P = 0.018).

#### **B,**

Normalized levels of anandamide (AEA) in the hippocampus of recipient mice, supplemented with either AA or *L. plantarum*<sup>WJL</sup> (n=5/group), as determined by LC-MS. Control microbiota and UCMS microbiota are the same as in figure 2F. Data are represented as mean ± s.e.m. Statistical significance was calculated using One-way ANOVA test (\* P<0.05, \*\*\*\* P<0.0001). (UCMS microbiota vs UCMS microbiota + AA, P = 0.075; UCMS microbiota vs UCMS microbiota + *Lp*<sup>WJL</sup>, P < 0.0001).

Supplementary Figure 7

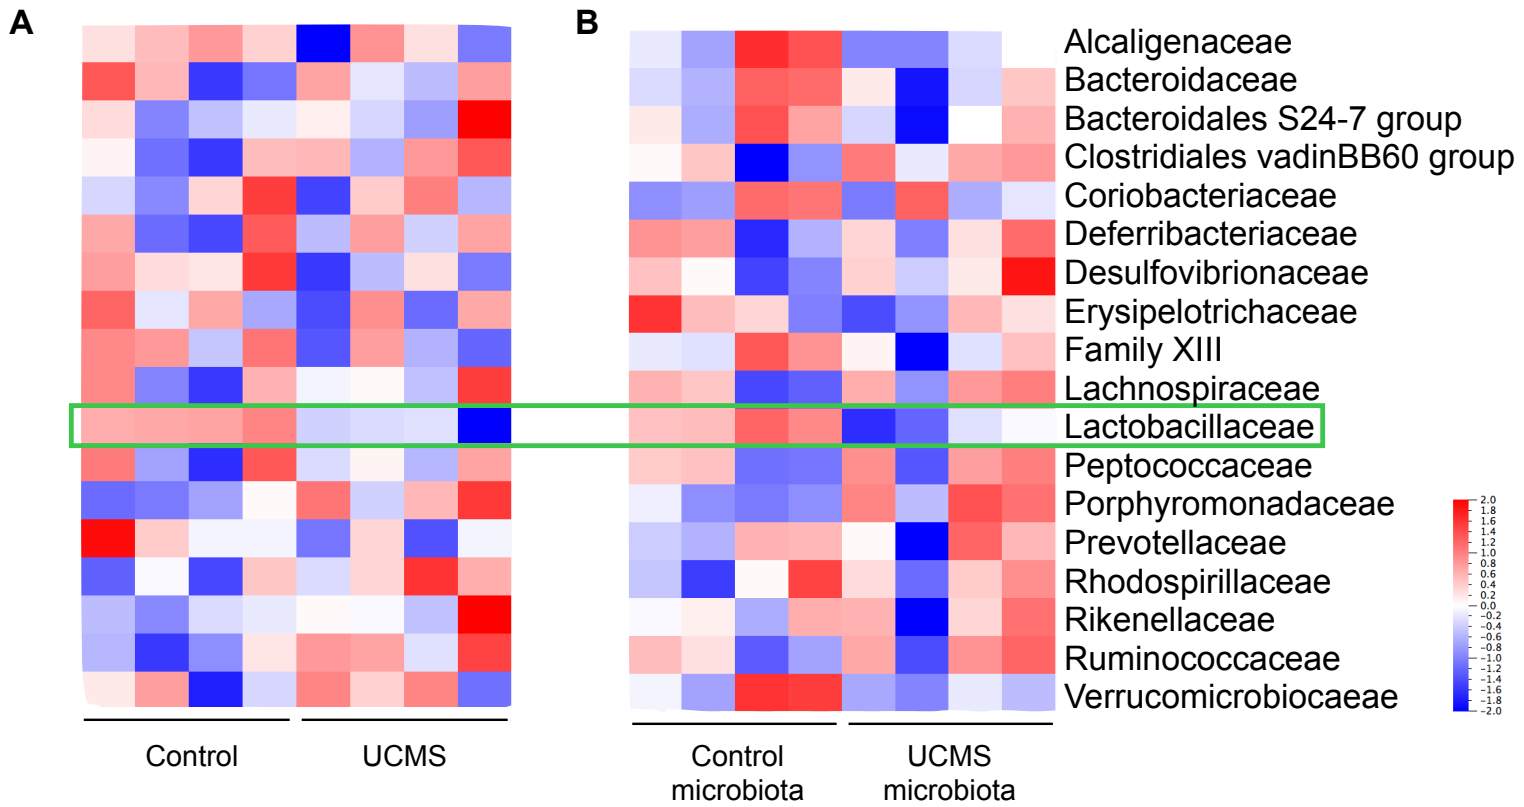



**Supplementary Figure 7 Unpredictable Chronic Mild Stress (UCMS) Alters Gut Microbiota and is Transferable to Recipient Mice.** The 16S rDNA of the intestinal microbiota was sequenced and analyzed at the level of bacterial families in donor ( $n = 4/\text{group}$ ) (**A**) and recipient mice ( $n = 4/\text{group}$ ) (**B**).
